# Supplementary material for: Atmospheric CO 2 estimates for the Miocene to Pleistocene based on foraminiferal δ 11 B at Ocean Drilling Program Sites 806 and 807 in the Western Equatorial Pacific
Source: Copernicus journal article supplement (doi:10.5194/cp-18-183-2022), 2022-02-02
Supplement: Supplementary file 1 [file cp-18-183-2022-supplement.zip]

**SUPPLEMENTAL INFORMATION**

**Atmospheric CO<sub>2</sub> estimates for the Miocene to Pleistocene based on foraminiferal  $\delta^{11}\text{B}$   
at Ocean Drilling Program Sites 806 and 807 in the Western Equatorial Pacific**

Maxence Guillermic<sup>1,2</sup>, Sambuddha Misra<sup>3,4</sup>, Robert Eagle<sup>1,2</sup>, Aradhna Tripathi <sup>1,2</sup>

<sup>1</sup>Department of Atmospheric and Oceanic Sciences, Department of Earth, Planetary, and  
Space Sciences, Center for Diverse Leadership in Science, Institute of the Environment and  
Sustainability, University of California – Los Angeles, Los Angeles, CA 90095 USA

<sup>2</sup>Laboratoire Géosciences Océan UMR6538, UBO, Institut Universitaire Européen de la Mer,  
Rue Dumont d'Urville, 29280, Plouzané, France

<sup>3</sup>The Godwin Laboratory for Palaeoclimate Research, Department of Earth Sciences,  
University of Cambridge, UK

<sup>4</sup>Indian Institute of Science, Centre for Earth Sciences, Bengaluru, Karnataka 560012, India

## Supplemental Methods

### S1. Potential contamination

We found no evidence for contamination of TE (including Mg/Ca) arising from the presence of silicate minerals or Mn-Fe-Oxide coatings. Contamination of samples by silicate minerals was monitored using Fe/Mg ratios. Samples with Fe/Mg > 0.1 mol/mol are typically rejected due to potential contamination by silicate minerals (Barker et al., 2003). Our samples have an average Fe/Mg of  $0.034 \pm 0.07$  mol/mol (2 SD, n=106), indicating that silicate minerals have been efficiently removed during our cleaning. Contamination by clays was monitored using Ti/Ca no correlations were found between Ti/Ca and Mg/Ca ( $R^2=0.0066$ ) or with B/Ca ( $R^2=0.0237$ ). Contamination by Mn-Fe oxides is detected using Mn/Ca ratios and Fe/Ca ratios. Our samples have Mn/Ca ratios of  $0.12 \pm 0.11$  mmol/mol (2 SD, n=108) consistent with previous published data of cleaned samples (Wara et al., 2005). No correlations was observed between Mg/Ca and Fe/Ca ( $R^2=0.0841$ ) or between Mg/Ca and Mn/Ca ( $R^2=0.0161$ ). No significant correlation was observed between B/Ca and Mn/Ca ( $R^2=0.0011$ ) or B/Ca and Fe/Ca ( $R^2=0.0132$ ) ratios.

### S2. Calculations of temperature, salinity, pH, and $pCO_2$

Analyses of  $\delta^{11}B$ ,  $\delta^{18}O$  and elemental ratios (eg., Mg/Ca, B/Ca) were used to reconstruct the chemical and physical properties of seawater over the last 17 My of the Western Equatorial Pacific (Fig. 2).

#### S2.1. Salinity reconstruction

Salinity was reconstructed using the relative sea level (RSL) reconstruction from Stap et al. (2017) and equation S1:

$$S=S_{\text{modern}}/3800*(3800+RSL) \quad \text{eq. S1}$$

$S_{\text{modern}}$  is the modern salinity corresponding to the depth habitat of the foraminifera at the site of interest. The depths used were 125 m for *T. sacculifer* and 80m for *G. ruber* (Rickaby et al., 2005; Guillermic et al., 2020). At Site 806, values for  $S_{\text{modern}}$  of 35.38 was used for *T. sacculifer* and 35.01 was used for *G. ruber*. At Site 807, a value of 35.05 was used for *T. sacculifer*.

## S2.2. Temperature

Paleotemperatures were calculated using Mg/Ca ratios of planktic foraminifera. A number of factors have been shown to impact Mg/Ca ratios and calculated paleotemperature. Factors identified in prior studies include salinity and pH effects on Mg/Ca, seawater Mg/Ca ratios, cleaning methodology, dissolution, and basin-specific equations, as discussed in more detail below. Below we describe some of the prior work that was factored into the regional mono-specific equations we used for calculating temperature from Mg/Ca.

### S2.2.1. Prior work showing evidence for salinity and pH effects on Mg/Ca-T

Studies have found that Mg/Ca ratios in foraminifera are impacted by salinity (Nürnberg et al., 1996; Hönisch et al., 2013) and pH or  $[\text{CO}_3^{2-}]$  (Russell et al., 2004; Kisakürek et al., 2008; Evans et al., 2016; Gray et al., 2018; Gray and Evans, 2019). Based on culture experiments, Gray and Evans (2019) reported impacts of both salinity and pH on *G. ruber* but only a salinity effect on *T. sacculifer*, and derived the following equations:

$$\text{SST } (T. \text{ sacculifer}) = (\text{Ln}(\frac{\text{Mg}}{\text{Ca}} \text{ test}) - 0.054 * (S - 35) + 0.24)/0.062 \quad \text{eq. S2}$$

$$\text{SST } (G. \text{ ruber}) = (\text{Ln}(\frac{\text{Mg}}{\text{Ca}} \text{ test} - 0.036 * (S - 35) + 0.87 * (\text{pH} - 8) + 0.03)/0.064 \quad \text{eq. S3}$$

### S2.2.2. Prior work showing evidence for variations in Mg/Ca ratios of seawater

Over timescales of  $10^6$ - $10^7$  years,  $\text{Mg}/\text{Ca}_{\text{sw}}$  can vary. Evidence from evaporites, carbonate veins, fossil corals and models suggests that seawater  $\text{Mg}/\text{Ca}_{\text{sw}}$  ratios have varied through time with variations of  $\sim 3$  mol/mol (Horita et al., 2002; DeFante and Paolo, 2006; Coggon et al., 2011; Brennan et al., 2013; Gothman et al., 2015). These studies do not agree on the timing of changes in  $\text{Mg}/\text{Ca}_{\text{sw}}$ . To correct for secular variations in  $\text{Mg}/\text{Ca}_{\text{sw}}$  we used the approach of O'Brien et al. (2014), theoretical work from Evans and Muller, (2012), and the  $\text{Mg}/\text{Ca}_{\text{sw}}$  fourth polynomial equation from Sosdian et al., (2020) derived from calcite veins (Coggon et al., 2010; Rausch et al., 2013), fluid inclusions (Brennan et al., 2013; Horita et al., 2002), echinoderms (Dickson, 2002), and larger benthic foraminifera (Evans et al., 2018). The equations we utilized are adapted from Dekens et al. (2002):

$$\text{SST } (T. \text{ sacculifer}) = (\text{Ln}(\frac{\text{Mg}}{\text{Ca}} \text{ test} * \frac{\text{Mg}^H}{\text{Ca}} \text{ sw}_{t0}) - \text{Ln}(0.37 * \frac{\text{Mg}^H}{\text{Ca}} \text{ sw}_t))/0.09 + 0.36 * C + D$$

eq. S4

$$SST (G. ruber) = (Ln(\frac{Mg}{Ca}_{test} * \frac{Mg^H}{Ca} sw_{t0}) - Ln(0.37 * \frac{Mg^H}{Ca} sw_t))/0.09 + 0.61 * C + D \quad \text{eq. S5}$$

Specifically H refers to the power components of the power law relationship between the Mg partition coefficient and Mg/Ca<sub>sw</sub>, with a value of 0.41 for *T. sacculifer* (Delaney et al., 1985) which we also assume is the same for *G. ruber*. C is the depth of the site. D refer to a basin-specific offset, which is 2 °C for *T. sacculifer* and 2.9 °C for *G. ruber* for the Pacific Ocean, (Table S1).

### S2.2.3. Prior work on reductive cleaning effects on Mg/Ca

The use of a reductive step in cleaning has been shown to lower Mg/Ca<sub>test</sub> ratios in planktic (Barker et al., 2003; Bian et al., 2010; Johnstone et al., 2016) and benthic foraminifera (Yu et al., 2007a), and contribute to offsets between studies using different methodologies. A decrease in Mg/Ca<sub>test</sub> of 6-9% was reported for *T. sacculifer* by Bian et al. (2010), and of 5% by Johnstone et al. (2016). A decrease of 4% was reported for *G. ruber* by Johnstone et al. (2016).

### S2.2.4. Mg/Ca-SST equations used for this study

Based on the above equations from Gray and Evans (2019) (eq. S2 and S3), we incorporated a term to account for changes in the Mg/Ca ratio of seawater, and based on results from Dekens et al., (2002) we incorporated two terms to account for dissolution (C) and basin-specific offsets (D), and used an iterative approach for our calculations to account for pH effect on *G. ruber* (Gray and Evans, 2019). The equations we used are:

$$SST (T. sacculifer) = \frac{Ln\left(\frac{Mg}{Ca}_{test} * 1.05 * \frac{\frac{Mg^H}{Ca} sw_{t0}}{\frac{Mg^H}{Ca} sw_t}\right) - 0.054 * (S - 35) + 0.24}{0.062} + 0.36 * C + 2.0 \quad \text{eq. S6}$$

$$SST (G. ruber) = \frac{Ln\left(\frac{Mg}{Ca}_{test} * 1.05 * \frac{\frac{Mg^H}{Ca} sw_{t0}}{\frac{Mg^H}{Ca} sw_t}\right) - 0.036 * (S - 35) + 0.87 * (pH - 8) + 0.03}{0.064} + 0.61 * C + 2.9 \quad \text{eq. S7}$$

With H being the power components of the power relationship between the Mg partition coefficient and Mg/Ca<sub>sw</sub>, 0.41 for *T. sacculifer* (Delaney et al., 1985). We use the same value

for *G. ruber*.  $C$  is the depth of the core (km). In order to take the impact of reductive cleaning into account we applied a decrease of 5% for *G. ruber* and *T. sacculifer* (Bian et al., 2010 and Johnstone et al., 2016).

Given evidence for a pH effect on Mg/Ca-SST calibration for *G. ruber*, we used an iterative approach for our calculations, following Gray and Evans, (2019). Up to 4 iterations were needed to achieve a difference in SST with the previous iteration of  $<0.05^{\circ}\text{C}$  and a difference in pH of  $<0.001$ . For this iterative approach, we first calculate  $\text{pH}_1$  from foraminiferal  $\delta^{11}\text{B}$ , then calculate  $\text{SST}_1$  from  $\text{pH}_1$ , then calculate  $\text{pH}_2$  with  $\text{SST}_1$ , and then repeat.

### S2.3. $\delta^{11}\text{B}_{\text{borate}}$ from $\delta^{11}\text{B}_{\text{carbonate}}$

The use of  $\delta^{11}\text{B}$  in foraminiferal carbonate to calculate seawater  $\delta^{11}\text{B}_{\text{borate}}$ , and derived pH and  $\text{pCO}_2$  values, has been shown to accurately replicate  $\text{pCO}_2$  records independently determined from ice cores and using oceanographic data, if several factors are taken into account (Chalk et al., 2017; Guillermic et al., 2020). These factors include mono-specific calibrations, size fraction or shell weight, basin, and water depth. In order to accurately reconstruct seawater pH (and  $\text{pCO}_2$ ) from  $\delta^{11}\text{B}$  of foraminifera, mono-specific calibrations are needed to convert  $\delta^{11}\text{B}_{\text{carbonate}}$  to  $\delta^{11}\text{B}_{\text{borate}}$ . Recent culture and field-based calibrations have refined the sensitivities of  $\delta^{11}\text{B}_{\text{carbonate}}$  to  $\delta^{11}\text{B}_{\text{borate}}$  for different foraminiferal species (Henahan et al., 2016; Raitzsch et al., 2018; Guillermic et al., 2020). For *T. sacculifer* and *G. ruber*, the sensitivities of  $\delta^{11}\text{B}_{\text{carbonate}}$  to  $\delta^{11}\text{B}_{\text{borate}}$  are 0.82 and 0.58, respectively (Raitzsch et al., 2018; Guillermic et al., 2020). As with Mg/Ca, the intercepts are prone to large uncertainties and are commonly adjusted based on core-top data, in order to yield the expected pre-industrial pH or  $\text{pCO}_2$  value at the site being examined (Chalk et al., 2017; Sosdian et al., 2018). The rationale for this correction is the impact of the depth habitat on microenvironment pH and subsequent  $\delta^{11}\text{B}_{\text{carbonate}}$  (Hönisch and Hemming, 2004; Guillermic et al., 2020) and/or preferential dissolution of gametogenic calcite (Ni et al., 2007). It is also possible that these offsets may reflect observed size effects on *G. ruber* as well as *T. sacculifer* (Henahan et al., 2013; Hönisch et al., 2019). For *T. sacculifer*, a relationship between shell size and  $\delta^{11}\text{B}_{\text{carbonate}}$  has been observed in the WEP (Hönisch and Hemming, 2004; Ni et al., 2007). Hönisch and Hemming, (2004) also reported that values for the 515-865  $\mu\text{m}$  size fraction yielded values of 21.76 ‰, and determined a size-fraction specific relationship. Here, we modify this approach to develop a shell-weight specific relationship:

$$\text{Size offset (\%)} = 21.76 - (0.06522 * \text{Weight/shell } (\mu\text{g}) + 17.38) \quad \text{eq. S8}$$

We adapted the equation for *T. sacculifer* from Guillermic et al. (2020):

$$\delta^{11}\text{B}_{\text{borate}} = [(\delta^{11}\text{B}_{T. \text{ sacculifer}} + \text{Size offset}) - 4.09 (\pm 0.86)] / 0.83 (\pm 0.48) \quad \text{eq. S9}$$

Due to the lack of coretop measurements for *G. ruber* from this study, we selected three control points at Marine isotope stages (MIS) 30, 37 and 39 (Lisiecky and Raymo, 2005) times when both *T. sacculifer* and *G. ruber* were measured to determine appropriate offsets for both Mg/Ca and  $\delta^{11}\text{B}$  that yield (Table S1 and S2) the best agreement between the species. This was used to adapt the equation from Guillermic et al. (2020) for *G. ruber*:

$$\delta^{11}\text{B}_{\text{borate}} = [(\delta^{11}\text{B}_{G. \text{ ruber}} + 2.0) - 9.11 (\pm 0.73)] / 0.58 (\pm 0.91) \quad \text{eq. S10}$$

## S2.4. Constants

Temperature, salinity and pressure were used to calculate the different dissociation constants and parameters. We used  $K_1$ ,  $K_2$  from Lueker et al. (2000),  $K_B$  from Dickson, (1990),  $\text{KSO}_4$  from Dickson, (1990),  $\text{KF}$  from Peres and Fraga, (1987) and total boron from Lee et al. (2010).

## S2.5. pH calculations

The quantitative estimation of pH using downcore  $\delta^{11}\text{B}_{\text{carbonate}}$  requires: 1) calculations of the borate isotopic composition of seawater ( $\delta^{11}\text{B}_{\text{borate}}$ ), 2) constraints on the secular variation of the boron isotopic composition of seawater ( $\delta^{11}\text{B}_{\text{seawater}}$ ), 3) the fractionation factor ( $\alpha$ ) between  $\text{B}(\text{OH})_3$  and  $\text{B}(\text{OH})_4^-$  and 4) the calculations of acid/base equilibrium constants based temperature, salinity and pressure. To translate our  $\delta^{11}\text{B}$  measurements to pH, we used the following relationship (Hemming and Hanson, 1992):

$$\text{pH} = \text{pK}_B^* - \log \left( \frac{\delta^{11}\text{B}_{\text{seawater}} - \delta^{11}\text{B}_{\text{borate}}}{\delta^{11}\text{B}_{\text{seawater}} - \alpha * \delta^{11}\text{B}_{\text{borate}} - \varepsilon} \right) \quad \text{eq. S11}$$

$\text{pK}_B^*$  is the dissociation constant between the two boron species (8.5975 at 25 °C and a salinity of 35 psu, Dickson, 1990). A fractionation between  $\text{B}(\text{OH})_3$  and  $\text{B}(\text{OH})_4^-$  ( $\varepsilon$ ) of  $27.2 \pm 0.6 \text{ ‰}$  was empirically determined by Klochko et al. (2006) in seawater and confirmed independently using a different method by Nir et al. (2015).

A few studies have attempted to reconstruct secular variations of  $\delta^{11}\text{B}_{\text{seawater}}$  (Lemarchand et al., 2000; Foster et al., 2012; Raitzsch and Hönisch, 2013; Greenop et al., 2017). For our work, we first compared different scenarios (Fig. 3). These scenarios are modeled values of  $\delta^{11}\text{B}_{\text{seawater}}$  based on constraints on the boron budget from Lemarchand et al. (2000), a second modeled history that assumed changes in seawater pH from Raitzsch and Hönisch (2013), and a third scenario that also considered constraints on pH gradients from  $\delta^{13}\text{C}$  measurements published by Greenop et al. (2017).

## S2.6. pCO<sub>2</sub> calculations

The carbonate system has two degrees of freedom, meaning that if two parameters of the carbonate system are known all the others can be calculated. For this study, we utilized pH calculated using  $\delta^{11}\text{B}_{\text{borate}}$ , and total alkalinity (TA) as a second parameter that are shown in Fig. 3-4. We used four different alkalinity scenarios for our calculations (Constant alkalinity; Tyrell and Zeebe, 2004; Ridgwell and Zeebe, 2005; and Caves et al. 2016). For all calculations, we used the MS excel program “CO<sub>2</sub>sys” version 2.3 from Pierrot et al. (2006). pH and TA, temperature, salinity were used to determined pCO<sub>2</sub> in ppm.

## S2.7. Error propagation for temperature (T), pH and pCO<sub>2</sub>

The main source of uncertainty in reconstructed pCO<sub>2</sub> comes from the errors in pH. Table S3 summarizes the sensitivity of pH and pCO<sub>2</sub> to different variables. The individual uncertainties were propagated in quadrature to combined uncertainties for temperature ( $\delta T$ ), pH ( $\delta \text{pH}$ ) and pCO<sub>2</sub> ( $\delta \text{pCO}_2$ ) (eq. S12, S13, S14, S15, S16 and S17). Minimum and maximum propagated uncertainties were derived separately for pH and pCO<sub>2</sub>.  $\delta \text{pCO}_2$  (A) is the full uncertainty propagation,  $\delta \text{pCO}_2$  (B) is the uncertainty propagation without taking into account the  $\delta^{11}\text{B}_{\text{sw}}$ . Both are shown in the figures and discussed below.

$$\delta T_{G. \text{ruber}} = \sqrt{(\delta T_{\text{Mg/Ca}})^2 + (\delta T_{\text{Salinity}})^2 + (\delta T_{\text{pH}})^2} \quad \text{eq. S12}$$

$$\delta T_{T. \text{sacculifer}} = \sqrt{(\delta T_{\text{Mg/Ca}})^2 + (\delta T_{\text{Salinity}})^2} \quad \text{eq. S13}$$

$$\delta pH (A) = \sqrt{(\delta pH\_Temperature)^2 + (\delta pH\_Salinity)^2 + (\delta pH\_^{11}B_{sw})^2 + (\delta pH\_^{11}B_{carbonate})^2}$$

**eq. S14**

211

$$\delta pH (B) = \sqrt{(\delta pH\_Temperature)^2 + (\delta pH\_Salinity)^2 + (\delta pH\_^{11}B_{carbonate})^2} \quad \text{eq. S15}$$

213

$$\delta pCO_2 (A) = \sqrt{\frac{(\delta pCO_2\_Temperature)^2 + (\delta pCO_2\_Salinity)^2 + (\delta pCO_2\_^{11}B_{sw})^2 + (\delta pCO_2\_^{11}B_{carbonate})^2 + (\delta pCO_2\_Alkalinity)^2}{}} \quad \text{eq. S16}$$

$$\delta pCO_2 (B) = \sqrt{\frac{(\delta pCO_2\_Temperature)^2 + (\delta pCO_2\_Salinity)^2 + (\delta pCO_2\_^{11}B_{carbonate})^2 + (\delta pCO_2\_Alkalinity)^2}{}} \quad \text{eq. S17}$$

216

217 With for example, “ $\delta pCO_2\_Temperature$ ” being the uncertainty in  $pCO_2$  due to temperature.

218

219

220

221



## Figures

**Figure S1:** Evaluation of pCO<sub>2</sub> reconstruction for the past 0.8 million year in the Western Equatorial Pacific compared to benthic oxygen isotope data. **A.** Benthic  $\delta^{18}\text{O}$  (blue line – stack from Lisiecki and Raymo, 2005; black line – compilation from Zachos et al., 2008). **B to E**, colored is indicating the site (filled light blue=806, filled dark blue=807), symbols represent the species (circle=*T. sacculifer* and triangle=*G. ruber*), filled grey squares are recalculated data based on Sosdian et al. (2018) at site 872. Reconstructed pCO<sub>2</sub> (ppm) using boron-based pH and alkalinity from Caves et al. (2016), data presented are from this study. Propagated uncertainties are given by eq. S17 for the dark blue envelope, while the light blue envelope are the uncertainties calculated based on eq. S16 (taking into account uncertainty on  $\delta^{11}\text{B}_{\text{seawater}}$ ). Solid black line represents data from ice cores (Bereiter et al., 2015). **B.** Colored data from this study. **C.** Colored data from this study and pCO<sub>2</sub> from original publications. **D.** Colored data from this study and data recalculated by Rae et al. (2021). **E.** Colored data from this study and data recalculated by Sosdian et al. (2018).

**Figure S2:** Evaluation of pCO<sub>2</sub> reconstruction for the past 22 million years in the Western Equatorial Pacific compared to benthic oxygen isotope data. **A.** Benthic  $\delta^{18}\text{O}$  (blue line – stack from Lisiecki and Raymo, 2005; black line – compilation from Zachos et al., 2008). **B to E**, colored is indicating the site (filled light blue=806, filled dark blue=807), symbols represent the species (circle=*T. sacculifer* and triangle=*G. ruber*), filled grey squares are recalculated data based on Sosdian et al. (2018) at site 872. Reconstructed pCO<sub>2</sub> (ppm) using boron-based pH and alkalinity from Caves et al. (2016), data presented are from this study. Propagated uncertainties are given by eq. S17 for the dark blue envelope, while the light blue envelope are the uncertainties calculated based on eq. S16 (taking into account uncertainty on  $\delta^{11}\text{B}_{\text{seawater}}$ ). Solid black line represents data from ice cores (Bereiter et al., 2015). **B.** Colored data from this study. **C.** Colored data from this study and pCO<sub>2</sub> from original publications. **D.** Colored data from this study and data recalculated by Rae et al. (2021). **E.** Colored data from this study and data recalculated by Sosdian et al. (2018).

**Figure S3:**  $\delta^{18}\text{O}$  records from ODP Sites 806 (benthic from Lear et al., 2003, 2015, dark red line; planktic from Medina-Elizalde and Lea, 2005, black line) and 807 (Zhang et al., 2007, dark green line) as well as benthic stack LR05 (Lisiecki and Raymo, 2005, grey line).

**Figure S4:** Cross plot for the last 0.8 Myr of pCO<sub>2</sub>*T. sacculifer* from this study and pCO<sub>2</sub> ice core (from ice core compilation, Bereiter et al., 2015). **A.** Open blue symbols (this study), open triangles (Chalk et al., 2017) and green squared (Hönisch et al., 2009), unit of pCO<sub>2</sub> are the same as original publications. Lines are linear regressions from each study (blue for this study; grey for Chalk et al., 2017; green for Hönisch et al., 2009), blue dotted line is a Deming regression for the data in our study with bootstrap (n=1000) taking into account both x and y uncertainties (p = 0.25), ice core CO<sub>2</sub> error calculated based 2 SD on  $\pm 1$  ky on the age determined from age model and boron based pCO<sub>2</sub> error is calculated based on error propagation eq. S17, outputs of the regression are presented in Table S6; our data present more variability than Chalk et al. (2017) or Hönisch et al. (2009). **B.** Data from this study, ODP Site 806 (light blue) and ODP Site 807 (dark blue) to assess no significant difference in variability between Sites.

## Tables

**Table S1:** Analytical data and reconstructed parameters for ODP Sites 806 and 807.

**Table S2:** Control points for a 2‰ offset used for *G. ruber*.

**Table S3:** Comparison of the control points reconstructions between *T. sacculifer* and *G. ruber* for MIS 30, 37 and 39, using different offsets (see text).

268 **Table S4:** Sensitivity tests for reconstructed pH and pCO<sub>2</sub> (G17, Caves-16), all results are given as  
269 the minimum and maximum variation (%) observed in our data.

270

271 **Table S5:** Boron isotopes standard reproducibility.

272

273 **Table S6:** CamWuellesstorfi, X/Ca standard reproducibility.

274

275 **Table S7:** Output of linear and Deming regressions made on the comparison between ice core  
276 and boron isotopes derived pCO<sub>2</sub>.

Table S2: Control points for a 2‰ offset used for *G. ruber*

|        | Species              | Sample |     |   | med  | mbstf | Shell Wt | Age   | SST   | error     | Salinity      | TA  | pH   | error(1) | up   | pCO <sub>2</sub> | error(1) | up    | error(1) | down  |
|--------|----------------------|--------|-----|---|------|-------|----------|-------|-------|-----------|---------------|-----|------|----------|------|------------------|----------|-------|----------|-------|
|        |                      |        |     |   | (µg) | (Ma)  | (°C)     | (°C)  | (psu) | (µmol/kg) | (total scale) |     |      |          |      | (ppm)            |          | (ppm) |          | (ppm) |
| MIS 30 | <i>G. ruber</i>      | 806    | B 3 | 5 | 6    | 8     | 22.06    | 22.06 | 16.1  | 1.046     | 26.2          | 1.8 | 35.3 | 2241     | 8.16 | 0.09             | 258      | 74    |          | 57    |
|        | <i>T. sacculifer</i> | 806    | B 3 | 5 | 31   | 33    | 22.31    | 22.31 | 18.2  | 1.048     | 26.0          | 0.9 | 35.6 | 2230     | 8.28 | 0.08             | 174      | 47    |          | 37    |
| MIS 37 | <i>G. ruber</i>      | 806    | B 4 | 1 | 71   | 73    | 26.21    | 26.21 | 17.0  | 1.240     | 26.4          | 1.9 | 35.1 | 2230     | 8.09 | 0.09             | 318      | 96    |          | 72    |
|        | <i>T. sacculifer</i> | 806    | B 4 | 1 | 56   | 58    | 26.06    | 26.06 | 22.2  | 1.233     | 29.8          | 0.9 | 35.6 | 2228     | 8.08 | 0.09             | 308      | 91    |          | 69    |
| MIS 39 | <i>G. ruber</i>      | 806    | B 4 | 1 | 131  | 133   | 26.81    | 26.81 | 16.1  | 1.267     | 27.8          | 1.9 | 35.5 | 2228     | 8.09 | 0.09             | 320      | 95    |          | 71    |
|        | <i>T. sacculifer</i> | 806    | B 4 | 1 | 146  | 148   | 26.96    | 26.96 | 24.0  | 1.274     | 27.8          | 0.9 | 35.6 | 2219     | 8.07 | 0.09             | 319      | 97    |          | 72    |

**Table S3:** Comparison of the control points reconstructions between *T. sacculifer* and *G. ruber* for MIS 30, 37 and 39, using different offsets (see text).

|                         | 1.8 ‰ offset |        |        | 1.85 ‰ offset |        |        | 2.0 ‰ offset |        |        | 2.1 ‰ offset |        |        |
|-------------------------|--------------|--------|--------|---------------|--------|--------|--------------|--------|--------|--------------|--------|--------|
|                         | MIS 30       | MIS 37 | MIS 39 | MIS 30        | MIS 37 | MIS 39 | MIS 30       | MIS 37 | MIS 39 | MIS 30       | MIS 37 | MIS 39 |
| ΔpCO <sub>2</sub> (ppm) | 105          | 37     | 26     | 100           | 31     | 20     | 86           | 13     | 2      | 77           | 1      | -10    |
| ΔpH (tot scale)         | -0.14        | -0.02  | -0.01  | -0.14         | -0.01  | -0.003 | -0.12        | 0.01   | 0.02   | -0.11        | 0.02   | 0.03   |
| ΔT (°C)                 | -0.02        | -3.75  | -0.36  | 0.06          | -3.65  | -0.27  | 0.31         | -3.39  | -0.005 | 0.47         | -3.21  | 0.17   |

**Table S4:** Sensitivity tests for reconstructed pH and pCO<sub>2</sub> (G17, Caves-16), all results are given as the minimum and maximum variation (%) observed in our data

|                                           | Salinity   | Temperature | $\delta^{11}\text{B}_{\text{carbonate}}$ | $\delta^{11}\text{B}_{\text{seawater}}$ | Alkalinity |
|-------------------------------------------|------------|-------------|------------------------------------------|-----------------------------------------|------------|
| pH ( <i>G. ruber</i> )                    | 0.07%      | 0.2-0.3%    | 0.2-0.5%                                 | 0.8-1.6%                                | NA         |
| pH ( <i>T. sacculifer</i> )               | 0.07-0.08% | 0.12-0.13%  | 0.1-0.5%                                 | 0.8-1.4%                                | NA         |
| pCO <sub>2</sub> ( <i>G. ruber</i> )      | 0.8-1.5%   | 0.02-1.5%   | 5-11%                                    | 19-25%                                  | 5%         |
| pCO <sub>2</sub> ( <i>T. sacculifer</i> ) | 0.8-1.4%   | 0.02-0.7%   | 3-12%                                    | 19-27%                                  | 5-7%       |

NA: non determined parameter

**Table S5:** Boron isotopes standard reproducibility.

| Standard | $\delta^{11}\text{B}_1$ (‰)   | 2SD <sub>AEI21</sub> | n <sub>AEI21</sub> | $\delta^{11}\text{B}_2$ (‰) | 2SD <sub>AEI21</sub> | n <sub>AEI21</sub> |
|----------|-------------------------------|----------------------|--------------------|-----------------------------|----------------------|--------------------|
| NEP1     | 25.36                         | 0.36                 | 11                 | 25.32                       | 0.36                 | 11                 |
| NEP2     | 25.21                         | 0.25                 | 11                 | 25.22                       | 0.25                 | 11                 |
| NEP3     | 25.00                         | 0.30                 | 12                 | 24.70                       | 0.30                 | 12                 |
| NEP4     | 25.40                         | 0.21                 | 11                 | 25.32                       | 0.21                 | 11                 |
| NEP5     | 25.33                         | 0.21                 | 11                 | 25.22                       | 0.21                 | 11                 |
| NEP7     | 25.26                         | 0.26                 | 15                 | 25.39                       | 0.26                 | 15                 |
| NEP8     | 26.15                         | 0.26                 | 15                 | 25.97                       | 0.26                 | 15                 |
| NEP9     | 26.09                         | 0.26                 | 15                 | 26.09                       | 0.26                 | 15                 |
| NEP10    | 26.22                         | 0.26                 | 15                 | 26.29                       | 0.26                 | 15                 |
| NEP11    | 26.19                         | 0.26                 | 15                 | 26.21                       | 0.26                 | 15                 |
| NEP12    | 26.12                         | 0.26                 | 15                 | 26.13                       | 0.26                 | 15                 |
| NEP13    | 26.00                         | 0.26                 | 15                 | 26.04                       | 0.26                 | 15                 |
| NEP15    | 26.02                         | 0.29                 | 12                 |                             |                      |                    |
| NEP16    | 25.86                         | 0.29                 | 12                 |                             |                      |                    |
| NEP17    | 25.83                         | 0.19                 | 3                  | 25.49                       | 0.33                 | 8                  |
| NEP18    | 25.72                         | 0.19                 | 3                  | 26.03                       | 0.33                 | 8                  |
| NEP19    | 26.48                         | 0.33                 | 8                  | 26.06                       | 0.33                 | 8                  |
| NEP20    | 25.82                         | 0.27                 |                    | 25.50                       | 0.27                 |                    |
| NEP21    | 25.42                         | 0.15                 | 3                  |                             |                      |                    |
| NEP22    | 25.28                         | 0.29                 | 8                  |                             |                      |                    |
| NEP23    | 25.32                         | 0.15                 | 3                  | 25.34                       | 0.29                 | 8                  |
| NEP24    | 25.27                         | 0.29                 | 8                  | 25.47                       | 0.29                 | 8                  |
| NEP25    | 25.54                         | 0.22                 | 6                  |                             |                      |                    |
| NEP26    | 25.86                         | 0.22                 | 4                  | 25.95                       | 0.22                 | 4                  |
| NEP27    | 26.16                         | 0.22                 | 6                  | 26.42                       | 0.22                 | 6                  |
| NEP28    | 25.77                         | 0.25                 | 9                  |                             |                      |                    |
| NEP29    | 25.37                         | 0.22                 | 4                  |                             |                      |                    |
| NEP30    | 25.88                         | 0.25                 | 9                  |                             |                      |                    |
| NEP31    | 25.46                         | 0.22                 | 4                  |                             |                      |                    |
| NEP32    | 25.93                         | 0.25                 | 9                  |                             |                      |                    |
| NEP33    | 26.41                         | 0.22                 | 4                  | 26.21                       | 0.22                 | 4                  |
| JCP-1-1  | 24.07                         | 0.10                 |                    |                             |                      |                    |
| JCP-1-2  | 24.17                         | 0.11                 |                    | 24.17                       | 0.10                 |                    |
| JCP-1-3  | 24.01                         | 0.11                 |                    |                             |                      |                    |
| JCP-1-4  | 23.92                         | 0.26                 |                    |                             |                      |                    |
| JCP-1-5  | 24.03                         | 0.26                 |                    | 24.05                       | 0.39                 |                    |
| JCP-1-6  | 24.18                         | 0.36                 |                    | 24.16                       | 0.36                 |                    |
| Standard | Average $\delta^{11}\text{B}$ | 2SD                  | n                  |                             |                      |                    |
| NEP      | 25.72                         | 0.79                 | 31                 | This study                  |                      |                    |
| NEP      | 26.20                         | 0.88                 | 27                 | Holcomb et al. 2015         |                      |                    |
| NEP      | 25.80                         | 0.89                 | 6                  | Sutton et al. 2017          |                      |                    |
| JCP-1    | 24.06                         | 0.19                 | 6                  | This study                  |                      |                    |
| JCP-1    | 24.37                         | 0.32                 | 57                 | Holcomb et al. 2015         |                      |                    |
| JCP-1    | 24.42                         | 0.28                 | 7                  | Sutton et al. 2017          |                      |                    |

\*Some data in this table are also presented in Guillermic et al. 2021 because data were collected at the same period

**Table S6:** CamWuellerstorfi, X/Ca standard reproducibility

| Sample           | Li/Ca<br>μmol/mol | B/Ca<br>μmol/mol | Mg/Ca<br>mmol/mol | Sr/Ca<br>mmol/mol | Cd/Ca<br>μmol/mol | Ba/Ca<br>μmol/mol | U/Ca<br>nmol/mol | Mn/Ca<br>μmol/mol | Fe/Ca<br>mmol/mol |
|------------------|-------------------|------------------|-------------------|-------------------|-------------------|-------------------|------------------|-------------------|-------------------|
| CamWuellerstorfi | 16.0              | 204              | 1.22              | 1.31              | 0.26              | 4.6               | 43               | 67                | 0.04              |
| CamWuellerstorfi | 16.3              | 209              | 1.24              | 1.32              | 0.28              | 4.6               | 45               | 69                | 0.04              |
| CamWuellerstorfi | 16.3              | 209              | 1.23              | 1.31              | 0.26              | 4.6               | 44               | 77                | 0.04              |
| CamWuellerstorfi | 16.0              | 207              | 1.23              | 1.32              | 0.28              | 4.6               | 44               | 74                | 0.04              |
| CamWuellerstorfi | 16.4              | 210              | 1.23              | 1.32              | 0.27              | 4.6               | 42               | 74                | 0.04              |
| CamWuellerstorfi | 16.0              | 208              | 1.24              | 1.31              | 0.26              | 4.6               | 42               | 74                | 0.04              |
| CamWuellerstorfi | 16.6              | 213              | 1.23              | 1.32              | 0.28              | 4.6               | 44               | 74                | 0.04              |
| CamWuellerstorfi | 16.0              | 203              | 1.22              | 1.32              | 0.26              | 4.6               | 41               | 72                | 0.04              |
| CamWuellerstorfi | 16.1              | 205              | 1.22              | 1.32              | 0.27              | 4.6               | 42               | 76                | 0.04              |
| CamWuellerstorfi | 16.2              | 204              | 1.22              | 1.32              | 0.27              | 4.6               | 41               | 72                | 0.04              |
| CamWuellerstorfi | 16.1              | 205              | 1.22              | 1.32              | 0.27              | 4.5               | 41               | 71                | 0.04              |
| CamWuellerstorfi | 15.8              | 204              | 1.21              | 1.32              | 0.27              | 4.6               | 42               | 73                | 0.04              |
| CamWuellerstorfi | 16.1              | 206              | 1.22              | 1.32              | 0.27              | 4.6               | 42               | 68                | 0.04              |
| CamWuellerstorfi | 16.0              | 207              | 1.22              | 1.32              | 0.26              | 4.6               | 43               | 66                | 0.04              |
| CamWuellerstorfi | 15.9              | 203              | 1.21              | 1.32              | 0.27              | 4.6               | 42               | 68                | 0.04              |
| CamWuellerstorfi | 16.3              | 201              | 1.22              | 1.31              | 0.22              | 4.6               | 41               | 66                | 0.03              |
| CamWuellerstorfi | 16.1              | 203              | 1.22              | 1.32              | 0.23              | 4.6               | 42               | 67                | 0.03              |
| CamWuellerstorfi | 16.4              | 202              | 1.22              | 1.32              | 0.23              | 4.6               | 42               | 69                | 0.04              |
| CamWuellerstorfi | 16.3              | 202              | 1.22              | 1.31              | 0.22              | 4.6               | 41               | 68                | 0.04              |
| CamWuellerstorfi | 16.6              | 202              | 1.22              | 1.31              | 0.23              | 4.6               | 44               | 67                | 0.03              |
| CamWuellerstorfi | 16.6              | 205              | 1.22              | 1.31              | 0.24              | 4.5               | 42               | 66                | 0.03              |
| CamWuellerstorfi | 16.1              | 204              | 1.22              | 1.31              | 0.22              | 4.6               | 40               | 67                | 0.03              |
| CamWuellerstorfi | 16.4              | 204              | 1.22              | 1.31              | 0.23              | 4.6               | 43               | 67                | 0.03              |
| CamWuellerstorfi | 16.4              | 202              | 1.22              | 1.32              | 0.23              | 4.6               | 43               | 64                | 0.03              |
| CamWuellerstorfi | 16.2              | 198              | 1.22              | 1.31              | 0.31              | 4.6               | 42               | 74                | 0.04              |
| CamWuellerstorfi | 16.4              | 200              | 1.22              | 1.30              | 0.30              | 4.6               | 43               | 73                | 0.04              |
| CamWuellerstorfi | 16.2              | 201              | 1.23              | 1.31              | 0.31              | 4.7               | 43               | 74                | 0.04              |
| CamWuellerstorfi | 16.3              | 198              | 1.22              | 1.31              | 0.30              | 4.6               | 42               | 73                | 0.04              |
| CamWuellerstorfi | 16.6              | 200              | 1.23              | 1.30              | 0.30              | 4.6               | 42               | 73                | 0.04              |
| CamWuellerstorfi | 16.5              | 198              | 1.22              | 1.31              | 0.31              | 4.6               | 44               | 74                | 0.04              |
| CamWuellerstorfi | 16.1              | 201              | 1.22              | 1.30              | 0.32              | 4.7               | 43               | 74                | 0.04              |
| CamWuellerstorfi | 16.5              | 197              | 1.25              | 1.31              | 0.29              | 4.9               | 43               | 72                | 0.04              |
| CamWuellerstorfi | 16.6              | 197              | 1.25              | 1.32              | 0.29              | 4.8               | 44               | 74                | 0.04              |
| CamWuellerstorfi | 16.8              | 196              | 1.25              | 1.32              | 0.29              | 4.9               | 44               | 72                | 0.04              |
| CamWuellerstorfi | 17.0              | 198              | 1.25              | 1.32              | 0.28              | 4.9               | 44               | 71                | 0.04              |
| CamWuellerstorfi | 16.8              | 198              | 1.25              | 1.31              | 0.29              | 4.9               | 44               | 73                | 0.04              |
| CamWuellerstorfi | 16.5              | 198              | 1.25              | 1.31              | 0.29              | 4.9               | 43               | 72                | 0.04              |
| CamWuellerstorfi | 16.7              | 200              | 1.24              | 1.32              | 0.29              | 4.9               | 43               | 74                | 0.04              |
| CamWuellerstorfi | 16.9              | 202              | 1.24              | 1.31              | 0.29              | 4.9               | 43               | 74                | 0.04              |
| Average          | 16.3              | 203              | 1.23              | 1.31              | 0.27              | 4.7               | 43               | 71                | 0.04              |
| 2SD              | 0.6               | 8                | 0.02              | 0.01              | 0.05              | 0.2               | 2                | 7                 | 0.01              |
| n                | 39                | 39               | 39                | 39                | 39                | 39                | 39               | 39                | 39                |

\*Some data in this table are also presented in Guillermic et al. 2021 because data were collected at the same period

**Table S7:** Output of linear and Deming regressions made on the comparison between ice core and boron isotopes derived pCO<sub>2</sub>.

Linear regression

*Bootstrap (n=1000)*

|                  | <b>Output</b> | <b>Bias</b> | <b>SD</b> |
|------------------|---------------|-------------|-----------|
| <b>Slope</b>     | 0.73          | 0.06        | 0.51      |
| <b>Intercept</b> | 63            | -11,85      | 118       |
| <b>R2</b>        | 0.09          | 0.03        | 0.09      |
| <b>p-value</b>   | 0.25          | 0.04        | 0.23      |

Deming regression

*Bootstrap (n=1000)*

|                  | <b>Output</b> | <b>Bias</b> | <b>SD</b> |
|------------------|---------------|-------------|-----------|
| <b>Slope</b>     | 6.6           | 1.19        | 49.8      |
| <b>Intercept</b> | -1273.0       | -261        | 11501.0   |
| <b>R2</b>        | NA            | NA          | NA        |
| <b>p-value</b>   | 0.25          | 0.03        | 0.23      |



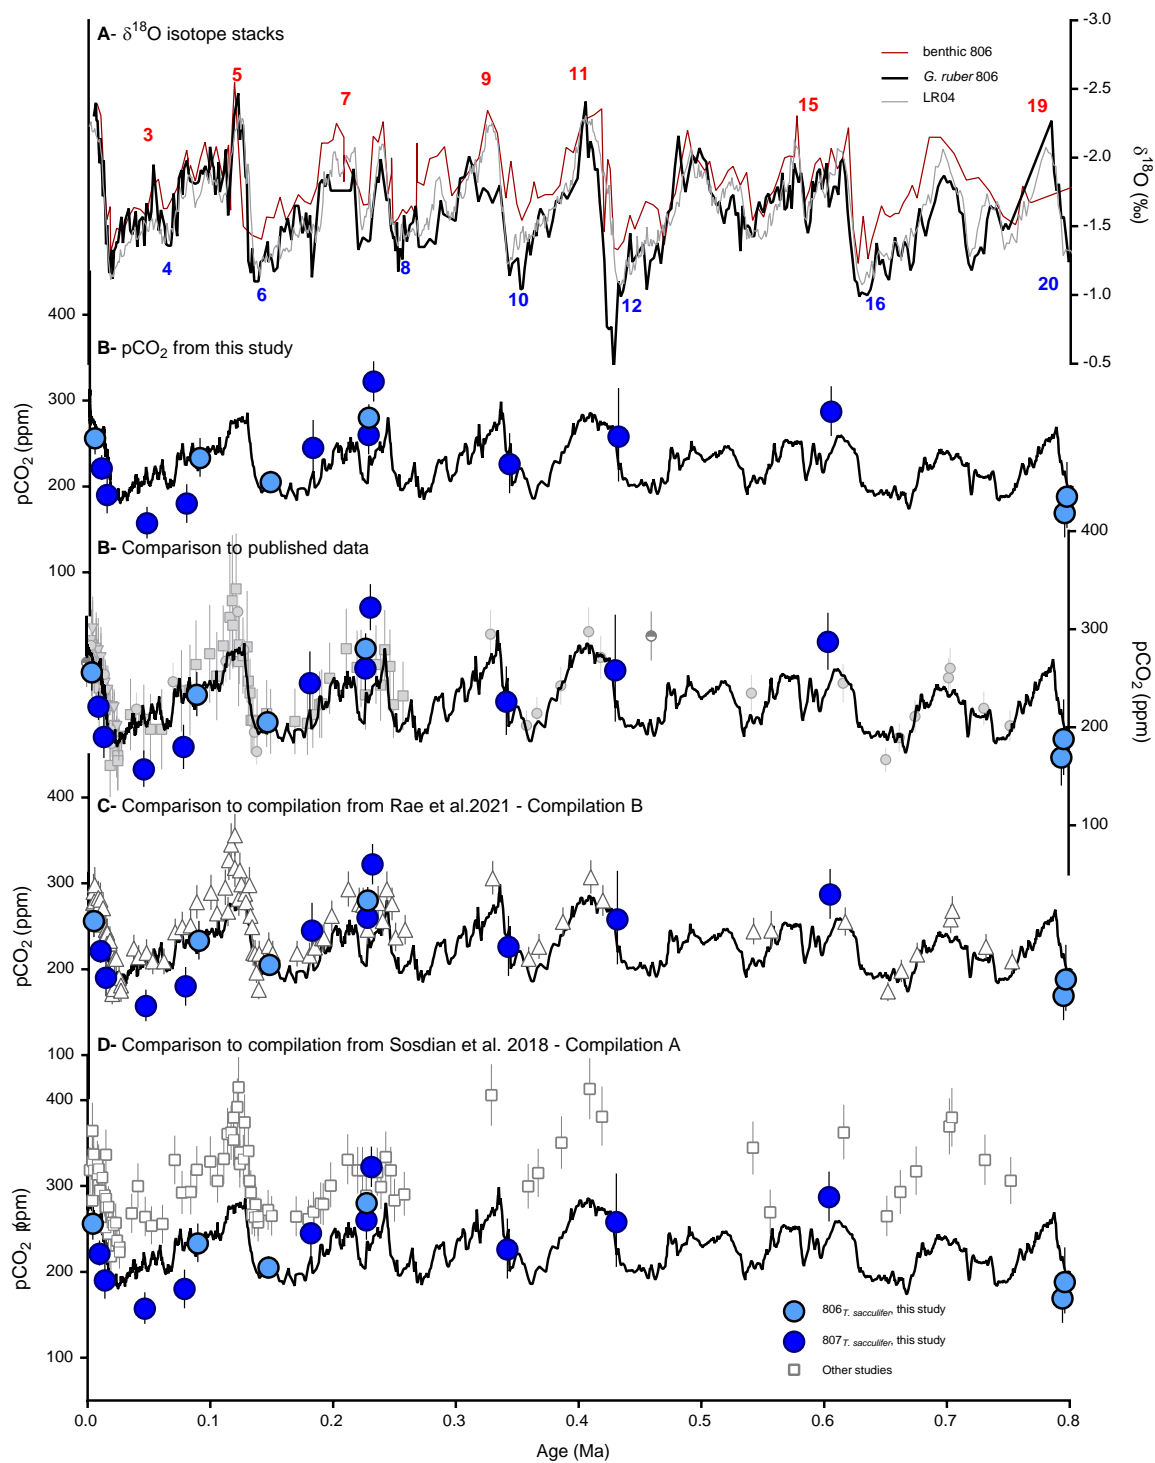

Figure S1

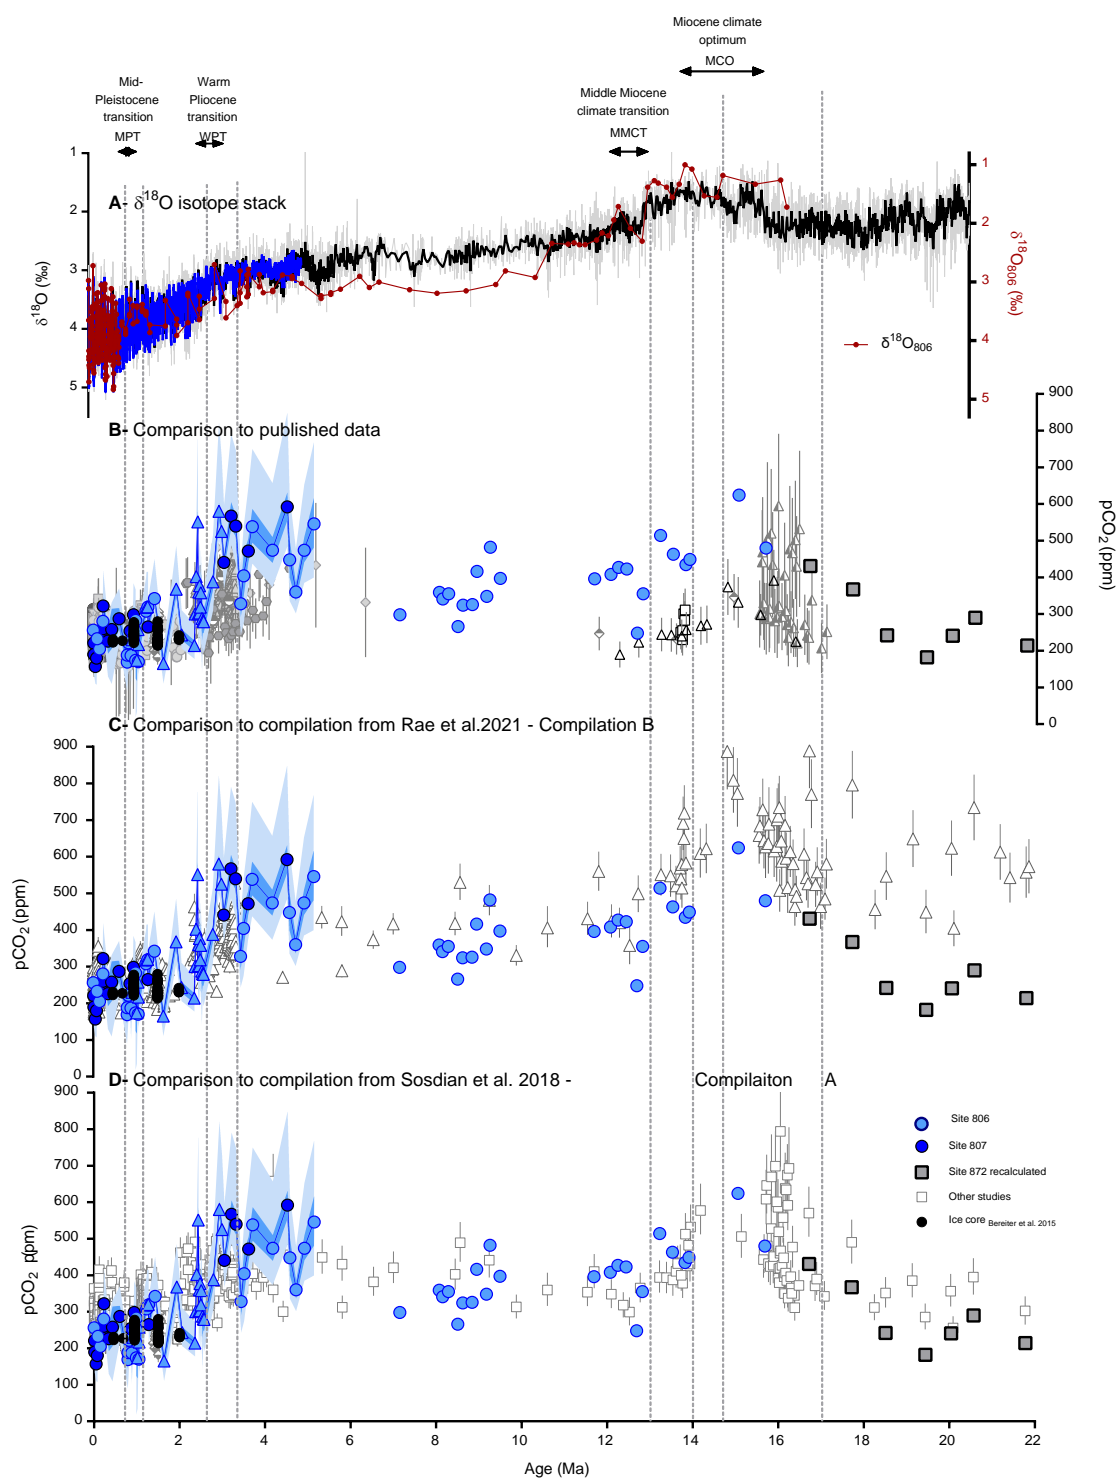

Figure S2

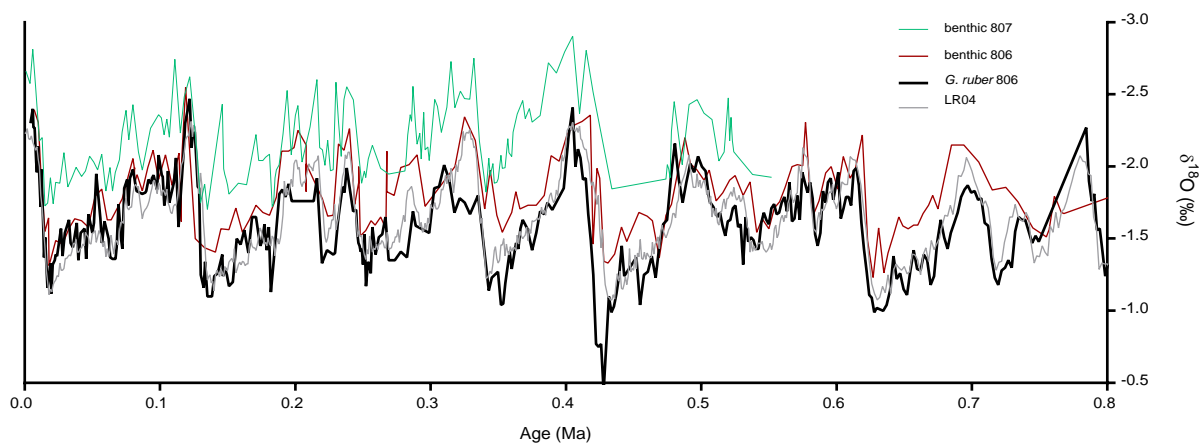

Figure S3

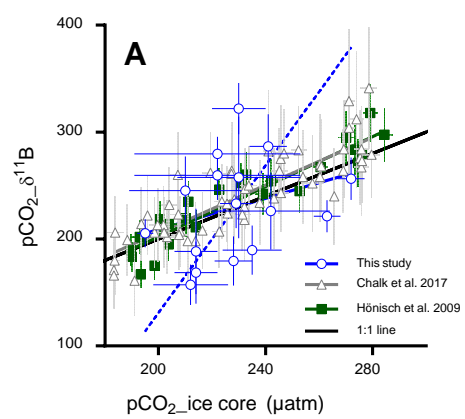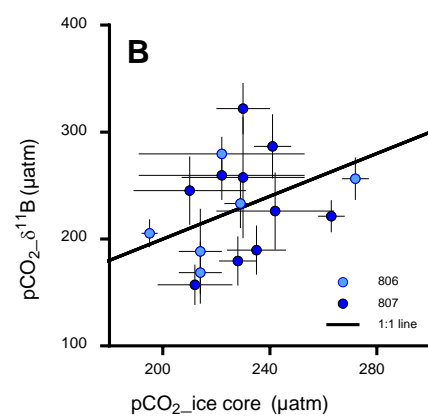

Figure S4

## References

- Barker S., Greaves M. and Elderfield H.: A study of cleaning procedures used for foraminiferal Mg/Ca paleothermometry. *Geochemistry, Geophys. Geosystems* 4, 1–20, 2003.
- Bian, N., & Martin, P. A.: Investigating the fidelity of Mg/Ca and other elemental data from reductively cleaned planktonic foraminifera. *Paleoceanography*, 25(2), 2010.
- Brennan, S. T., Lowenstein, T. K., & Cendón, D. I. : The major-ion composition of Cenozoic seawater: The past 36 million years from fluid inclusions in marine halite. *American Journal of Science*, 313(8), 713–775, 2013.
- Caves J. K., Jost A. B., Lau K. V. and Maher K.: Cenozoic carbon cycle imbalances and a variable weathering feedback. *Earth Planet. Sci. Lett.* 450, 152–163, 2016.
- Chalk T. B., Hain M. P., Foster G. L., Rohling E. J., Sexton P. F., Badger M. P. S., Cherry S. G., Hasenfratz A. P., Haug G. H., Jaccard S. L., Martínez-García A., Pälike H., Pancost R. D. and Wilson P. A.: Causes of ice age intensification across the Mid-Pleistocene Transition. *Proc. Natl. Acad. Sci.*, 201702143, 2017.
- Coggon, R. M., Teagle, D. A. H., Smith-Duque, C. E., Alt, J. C., & Cooper, M. J.: Reconstructing past seawater Mg/Ca and Sr/Ca from mid-ocean ridge flank calcium carbonate veins. *Science*, 327(5969), 1114–1117. <https://doi.org/10.1126/science.1182252>, 2010.
- Coggon, R. M., Teagle, D. A. H. and Dunkley Jones, T.: Comment on “What do we know about the evolution of Mg to Ca ratios in seawater?” by Wally Broecker and Jimin Yu. *Paleoceanography* 26, 2011.
- DeFante, M. S. and DePaolo, D. J.: Sr isotopes and pore fluid chemistry in carbonate sediment of the Ontong Java Plateau: Calcite recrystallization rates and evidence for a rapid rise in seawater Mg over the last 10 million years. *Geochim. Cosmochim. Acta* 70, 3883–3904, 2006.
- Dekens, P. S., Lea, D. W., Pak, D. K. and Spero H. J.: Core top calibration of Mg/Ca in tropical foraminifera: Refining paleotemperature estimation. *Geochemistry, Geophys. Geosystems* 3, 1–29, 2002.
- Delaney, M. L., Bé, A. W., & Boyle, E. A.: Li, Sr, Mg, and Na in foraminiferal calcite shells from laboratory culture, sediment traps, and sediment cores. *Geochimica et Cosmochimica Acta*, 49(6), 1327–1341, 1985.
- Dickson A. G.: Thermodynamics of the Dissociation of Boric Acid in Potassium Chloride Solutions from 273.15 to 318.15 K. *J. Chem. Eng. Data* 35, 253–257, 1990.
- Dickson, J. A. D.: Fossil echinoderms as monitor of the Mg/Ca ratio of Phanerozoic oceans. *Science*, 298(5596), 1222–1224. <https://doi.org/10.1126/science.1075882>, 2002.
- Evans, D. & Müller, W.: Deep time foraminifera Mg/Ca paleothermometry: Nonlinear correction for secular change in seawater Mg/Ca. *Paleoceanography* 27, PA4205, 2012.
- Evans, D., Sagoo, N., Renema, W., Cotton, L. J., Müller, W., Todd, J. A., Saraswati, P. K., Stassen, P., Ziegler, M., Pearson, P. N., Valdes, P. J., and Affek, H. P.: Eocene greenhouse climate revealed by coupled clumped isotope-Mg/Ca thermometry. *Proceedings of the National Academy of Sciences*, 115(6), 1174–1179. <http://doi.org/10.1073/pnas.1714744115>, 2018.
- Evans, D., Wade, B. S., Henenhan, M., Erez, J., & Müller, W.: Revisiting carbonate chemistry controls on planktic foraminifera Mg/Ca: implications for sea surface temperature and hydrology shifts over the Paleocene–Eocene Thermal Maximum and Eocene–Oligocene transition. *Climate of the Past*, 12(4), 819–835, 2016.
- Gothmann A. M., Stolarski J., Adkins J. F., Schoene B., Dennis K. J., Schrag D. P., Mazur M. and Bender M. L.: Fossil corals as an archive of secular variations in seawater chemistry since the Mesozoic. *Geochim. Cosmochim. Acta* 160, 188–208, 2015.
- Gray, W. R., & Evans, D.: Nonthermal influences on Mg/Ca in planktonic foraminifera: a review of culture studies and application to the Last Glacial Maximum. *Paleoceanography and Paleoclimatology*, 34(3), 306–315, 2019.
- Gray, W. R., Weldeab, S., Lea, D. W., Rosenthal, Y., Gruber, N., Donner, B., & Fischer, G.: The effects of temperature, salinity, and the carbonate system on Mg/Ca in *Globigerinoides ruber* (white): A global sediment trap calibration. *Earth and Planetary Science Letters*, 482, 607–620, 2018.

- Greenop R., Hain M. P., Sosdian S. M., Oliver K. I. C., Goodwin P., Chalk T. B., Lear C. H., Wilson P. A. and Foster G. L.: A record of Neogene seawater  $\delta^{11}\text{B}$  reconstructed from paired  $\delta^{11}\text{B}$  analyses on benthic and planktic foraminifera. *Clim. Past* 13, 149–170, 2017.
- Guillermic, M., Misra, S., Eagle, R., Villa, A., Chang, F., Tripathi, A.: Seawater pH reconstruction using boron isotopes in multiple planktonic foraminifera species with different depth habitats and their potential to constrain pH and pCO<sub>2</sub> gradients. *Biogeosciences*, 17(13), 3487–3510, 2020.
- Hemming N. G. and Hanson G. N.: Boron isotopic composition and concentration in modern marine carbonates. *Geochim. Cosmochim. Acta* 56, 537–543, 1992.
- Henehan M. J., Foster G. L., Bostock H. C., Greenop R., Marshall B. J. and Wilson P. A.: A new boron isotope-pH calibration for *Orbulina universa*, with implications for understanding and accounting for ‘vital effects.’ *Earth Planet. Sci. Lett.* 454, 282–292, 2016.
- Henehan M. J., Rae J. W. B., Foster G. L., Erez J., Prentice K. C., Kucera M., Bostock H. C., Martínez-Botí M. A., Milton J. A., Wilson P. A., Marshall B. J. and Elliott T. (2013) Calibration of the boron isotope proxy in the planktonic foraminifera *Globigerinoides ruber* for use in palaeo-CO<sub>2</sub> reconstruction. *Earth Planet. Sci. Lett.* 364, 111–122, 2013.
- Hönisch, B., Allen, K. A., Lea, D. W., Spero, H. J., Eggins, S. M., Arbuszewski, J., deMenocal, P., Rosenthal, Y., D. Russel, a.: Elderfield, H.: The influence of salinity on Mg/Ca in planktic foraminifers—Evidence from cultures, core-top sediments and complementary  $\delta^{18}\text{O}$ . *Geochimica Et Cosmochimica Acta*, 121, 196–213, 2013.
- Hönisch, B., Eggins, S. M., Haynes, L. L., Allen, K. A., Holland, K. D., & Lorbacher, K.: Boron Proxies in Paleoceanography and Paleoclimatology, 2019.
- Hönisch, B. and Hemming, N. G., Ground-truthing the boron isotope-paleo-pH proxy in planktonic foraminifera shells: Partial dissolution and shell size effects, *Paleoceanography* 19, 1–13, 2004.
- Horita J., Zimmermann H. and Holland H. D.: Chemical evolution of seawater during the Phanerozoic: Implications from the record of marine evaporites. *Geochim. Cosmochim. Acta* 66, 3733–3756., 2002.
- Johnstone, H. J., Lee, W., & Schulz, M.: Effect of preservation state of planktonic foraminifera tests on the decrease in Mg/Ca due to reductive cleaning and on sample loss during cleaning. *Chemical Geology*, 420, 23–36, 2016.
- Kırsaklırek, B., Eisenhauer, A., Böhm, F., Garbe-Schönberg, D., & Erez, J.: Controls on shell Mg/Ca and Sr/Ca in cultured planktonic foraminifera, *Globigerinoides ruber* (white). *Earth and Planetary Science Letters*, 273(3–4), 260–269, 2008.
- Klochko K., Kaufman A. J., Yao W., Byrne R. H. and Tossell J. A.: Experimental measurement of boron isotope fractionation in seawater. *Earth Planet. Sci. Lett.* 248, 261–270, 2006.
- Lee, K., Kim, T. W., Byrne, R. H., Millero, F. J., Feely, R. A., & Liu, Y. M.: The universal ratio of boron to chlorinity for the North Pacific and North Atlantic oceans. *Geochimica et Cosmochimica Acta*, 74(6), 1801–1811, 2010.
- Lemarchand D., Gaillardet J., Lewin and Allégre C. J.: The influence of rivers on marine boron isotopes and implications for reconstructing past ocean pH. *Nature* 408, 951–954, 2002.
- Lisiecki L. E. and Raymo M. E.: A Pliocene-Pleistocene stack of 57 globally distributed benthic  $\delta^{18}\text{O}$  records. *Paleoceanography* 20, 1–17, 2005.
- Lueker, T. J., Dickson, A. G., & Keeling, C. D.: Ocean pCO<sub>2</sub> calculated from dissolved inorganic carbon, alkalinity, and equations for K<sub>1</sub> and K<sub>2</sub>: validation based on laboratory measurements of CO<sub>2</sub> in gas and seawater at equilibrium. *Marine chemistry*, 70(1–3), 105–119, 2000.
- Medina-Elizalde M. and Lea D. W.: The mid-pleistocene transition in the tropical pacific. *Science* 310, 1009–1012, 2005.
- Misra, S., Greaves, M., Owen, R., Kerr, J., Elmore, A. C. and Elderfield, H.: Determination of B/Ca of natural carbonates by HR-ICP-MS. *Geochemistry, Geophys. Geosystems* 15, 1617–1628, 2014a.
- Ni Y., Foster G. L., Bailey T., Elliott T., Schmidt D. N., Pearson P., Haley B. and Coath C.: A core top assessment of proxies for the ocean carbonate system in surface-dwelling foraminifers. *Paleoceanography* 22, 2007.
- Nir O., Vengosh A., Harkness J. S., Dwyer G. S. and Lahav O.: Direct measurement of the boron isotope fractionation factor: Reducing the uncertainty in reconstructing ocean paleo-pH. *Earth Planet. Sci. Lett.* 414, 1–5, 2015.

- Nürnberg, D., Bijma, J., & Hemleben, C.: Assessing the reliability of magnesium in foraminiferal calcite as a proxy for water mass temperatures. *Geochimica et Cosmochimica Acta*, 60(5), 803–814, 1996.
- O'Brien C. L., Foster G. L., Martínez-Botí M. A., Abell R., Rae J. W. B. and Pancost R. D.: High sea surface temperatures in tropical warm pools during the Pliocene. *Nat. Geosci.* 7, 606–611, 2014.
- Perez, F. F., & Fraga, F.: Association constant of fluoride and hydrogen ions in seawater. *Marine Chemistry*, 21(2), 161–168, 1987.
- Pierrot, D., Lewis, E., & Wallace, D. W. R.: MS Excel program developed for CO<sub>2</sub> system calculations. ORNL/CDIAC-105a. Carbon Dioxide Information Analysis Center, Oak Ridge National Laboratory, US Department of Energy, Oak Ridge, Tennessee, 10, 2006.
- Raitzsch M. and Hönisch B.: Cenozoic boron isotope variations in benthic foraminifers. *Geology* 41, 591–594, 2013.
- Raitzsch M., Bijma J., Benthien A., Richter K. U., Steinhofel G. and Kučera M.: Boron isotope-based seasonal paleo-pH reconstruction for the Southeast Atlantic – A multispecies approach using habitat preference of planktonic foraminifera. *Earth Planet. Sci. Lett.* 487, 138–150, 2018.
- Rausch, S., Böhm, F., Bach, W., Klügel, A., & Eisenhauer, A.: Calcium carbonate veins in ocean crust record a threefold increase of seawater Mg/Ca in the past 30 million years. *Earth and Planetary Science Letters*, 362, 215–224, 2013.
- Rickaby, R. E. M. and Halloran, P.: Cool La Nina During the Warmth of the Pliocene?, *Science*, 307, 1948–1952, 2005.
- Ridgwell A. and Zeebe R. E.: The role of the global carbonate cycle in the regulation and evolution of the Earth system. *Earth Planet. Sci. Lett.* 234, 299–315, 2005.
- Russell, A. D., Hönisch, B., Spero, H. J., & Lea, D. W.: Effects of seawater carbonate ion concentration and temperature on shell U, Mg, and Sr in cultured planktonic foraminifera. *Geochimica et Cosmochimica Acta*, 68(21), 4347–4361, 2004.
- Sosdian, S. M., Babila, T. L., Greenop, R., Foster, G. L., & Lear, C. H.: Ocean carbon storage across the middle Miocene: A new interpretation for the Monterey Event. *Nature communications*, 11(1), 1–11, 2020.
- Sosdian, S. M., Greenop R., Hain M. P., Foster G. L., Pearson P. N. and Lear C. H.: Constraining the evolution of Neogene ocean carbonate chemistry using the boron isotope pH proxy. *Earth Planet. Sci. Lett.* 498, 362–376, 2018.
- Sutton J. N., Liu Y.-W., Ries J. B., Guillermin M., Ponzevera E. and Eagle R. A.:  $\delta^{11}\text{B}$  as monitor of calcification site pH in divergent marine calcifying organisms. *Biogeosciences* 15, 1447–1467, 2018.
- Tyrrell, T., & Zeebe, R. E.: History of carbonate ion concentration over the last 100 million years. *Geochimica et Cosmochimica Acta*, 68(17), 3521–3530, 2004.
- Yu, J., Elderfield, H., Greaves, M., & Day, J.: Preferential dissolution of benthic foraminiferal calcite during laboratory reductive cleaning. *Geochemistry, Geophysics, Geosystems*, 8(6), 2007a.
- Zachos J. C., Dickens G. R. and Zeebe R. E.: An early Cenozoic perspective on greenhouse warming and carbon-cycle dynamics. *Nature* 451, 279–283, 2008.
