# Supplementary material for: Atmospheric CO 2 estimates for the Miocene to Pleistocene based on foraminiferal δ 11 B at Ocean Drilling Program Sites 806 and 807 in the Western Equatorial Pacific
Source: Copernicus journal article supplement (doi:10.5194/cp-18-183-2022), 2022-02-02
Supplement: Supplementary file 2 [file cp-18-183-2022-supplement.zip]

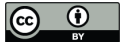

*Supplement of*

**Atmospheric CO<sub>2</sub> estimates for the Miocene to Pleistocene  
based on foraminiferal  $\delta^{11}\text{B}$  at Ocean Drilling Program  
Sites 806 and 807 in the Western Equatorial Pacific**

**Maxence Guillermic et al.**

*Correspondence to:* Maxence Guillermic ([maxence.guillermic@gmail.com](mailto:maxence.guillermic@gmail.com)) and Aradhna Tripathi ([atripathi@g.ucla.edu](mailto:atripathi@g.ucla.edu))

- [cp-18-183-2022-supplement-title-page.pdf](#)
- [Supplemental information.pdf](#)
- [Table S1.xlsx](#)

The copyright of individual parts of the supplement might differ from the article licence.
